# Supplementary material for: Pseudomonas putida KT2440 response to nickel or cobalt induced stress by quantitative proteomics
Source: Royal Society of Chemistry journal article supplement (doi:10.1039/c2mt20147j), 2012-11-29
Supplement: c2mt20147j.pdf [file c2mt20147j.pdf]

### Supplementary Figure 1

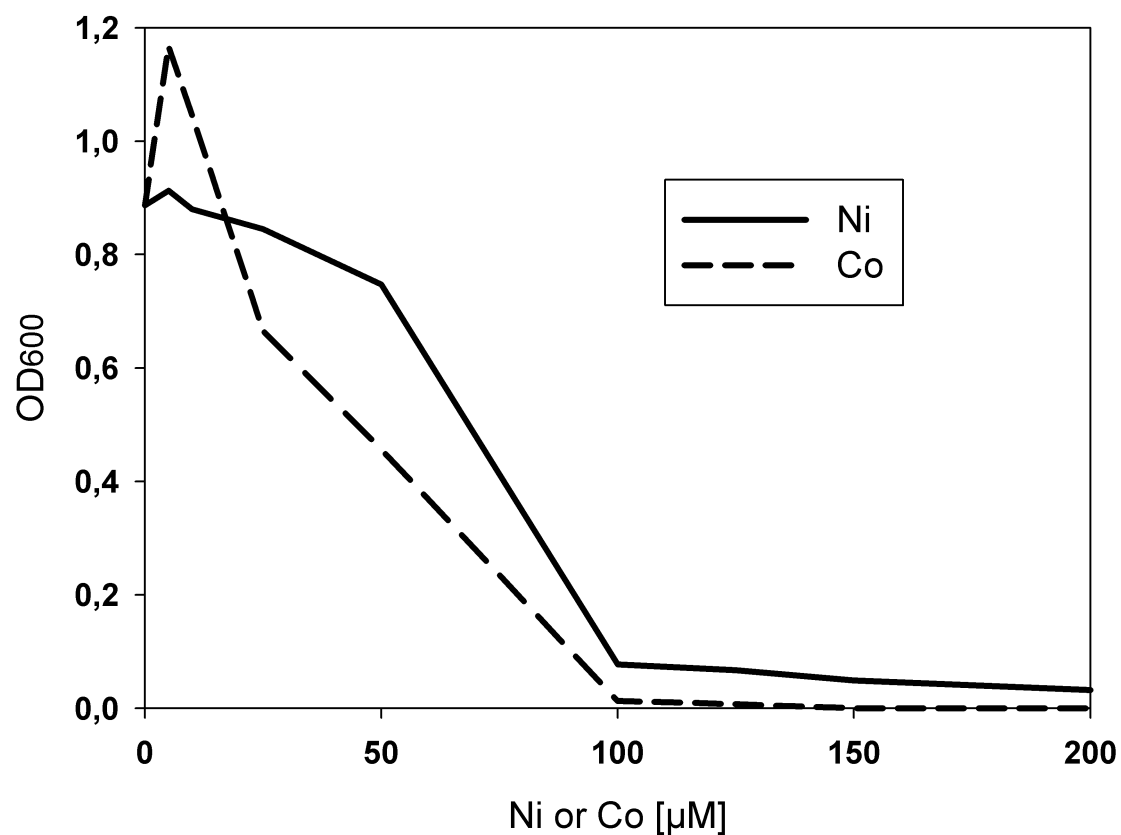

**Effect of Ni or Co on the growth of *P. putida* KT2440.** Cultures were performed in M63 minimal medium supplemented with 0.4% succinate. Increasing concentrations of NiCl<sub>2</sub> or CoCl<sub>2</sub> were added to the growth medium. OD<sub>600nm</sub> were measured after 12 h incubation at 30°C.
